# Supplementary material for: Interplay of Staphylococcal and Host Proteases Promotes Skin Barrier Disruption in Netherton Syndrome
Source: PubMed Central journal article supplement (PMC7183042; doi:10.1016/j.celrep.2020.02.021), 2020-03-03
Supplement: NIHMS1571421-supplement-1.pdf [file NIHMS1571421-supplement-1.pdf]

**Cell Reports, Volume 30**

## **Supplemental Information**

### **Interplay of Staphylococcal and Host**

#### **Proteases Promotes Skin Barrier**

#### **Disruption in Netherton Syndrome**

**Michael R. Williams, Laura Cau, Yichen Wang, Drishti Kaul, James A. Sanford, Livia S. Zaramela, Shadi Khalil, Anna M. Butcher, Karsten Zengler, Alexander R. Horswill, Christopher L. Dupont, Alain Hovnanian, and Richard L. Gallo**

**A**

| Subject | Flare | Scaly Erythroderma | ILC | Overall severity |
|---------|-------|--------------------|-----|------------------|
| NS1     | +     | 0                  | 3   | 3                |
| NS2     | +     | 0                  | 3   | 3                |
| NS3     | +     | 0                  | 1   | 1                |
| NS4     | +     | 0                  | 3   | 3                |
| NS5     | -     | 2                  | 0   | 2                |
| NS6     | -     | 2                  | 0   | 2                |
| NS7     | +     | 0                  | 3   | 3                |
| NS8     | -     | 0                  | 3   | 3                |
| NS9     | +     | 0                  | 3   | 3                |
| NS10    | -     | 3                  | 0   | 3                |

\*ILC: Ichthyosis Linearis Circumflexa

\*Disease Score: Score: 0=Absent, 1=Minimum, 2=Moderate, 3=Severe, 4=Very Severe

**B**

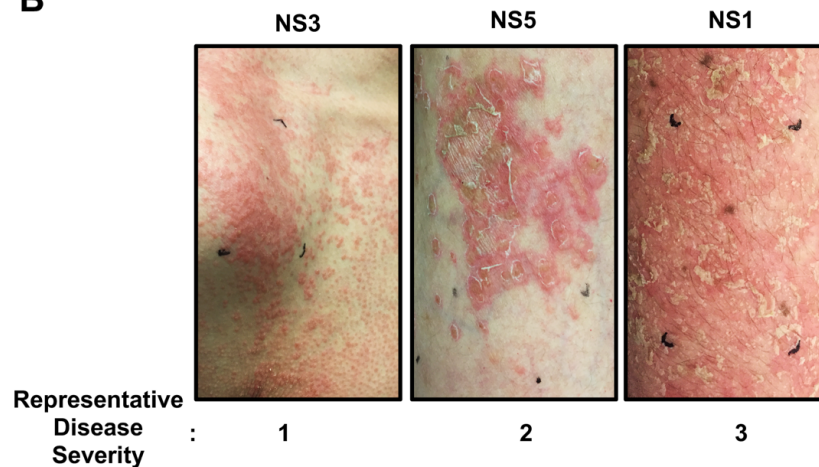

**Figure S1. (Related to Figure 1) Netherton syndrome subject disease severity scores.**

**(A)** Table showing representative whole-body severity scores for each subject.

**(B)** Representative pictures of NS skin with different disease severity (1=minimum, 2=moderate and 3=severe).

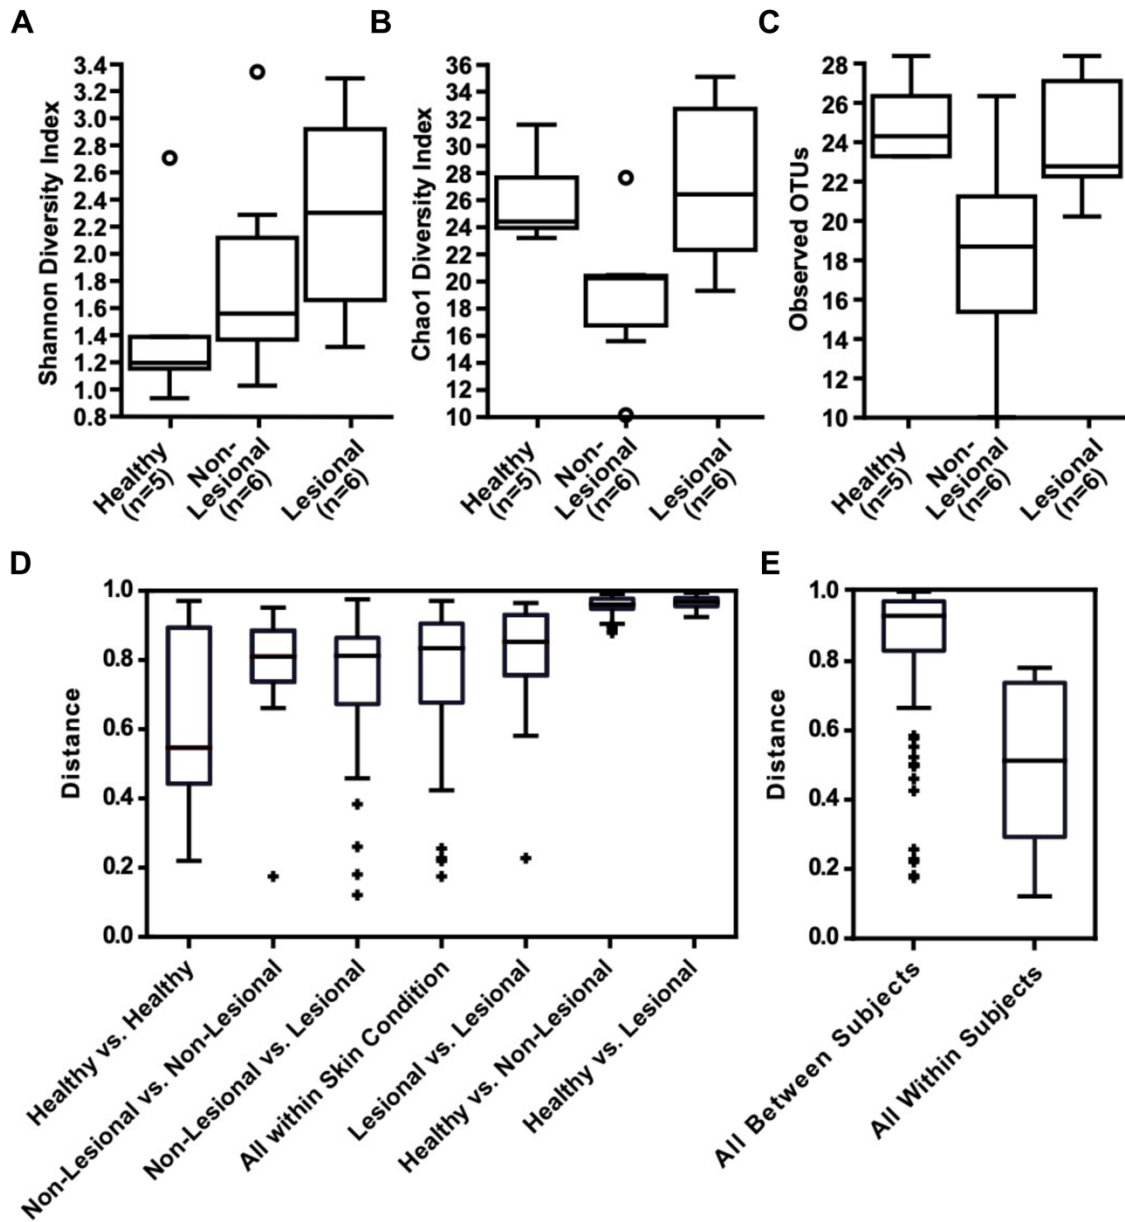

Figure S2. (Related to Figure 1) Netherton syndrome versus healthy control skin bacterial alpha and beta diversity.

(A-C) Alpha diversity measured by (A) Shannon diversity index, (B) Chao1 diversity index and (C) number of observed OTUs for healthy control and NS non-lesional and lesional skin.

(D) Beta diversity distance between and within sample groupings by skin condition.

(E) Beta diversity amongst subjects.

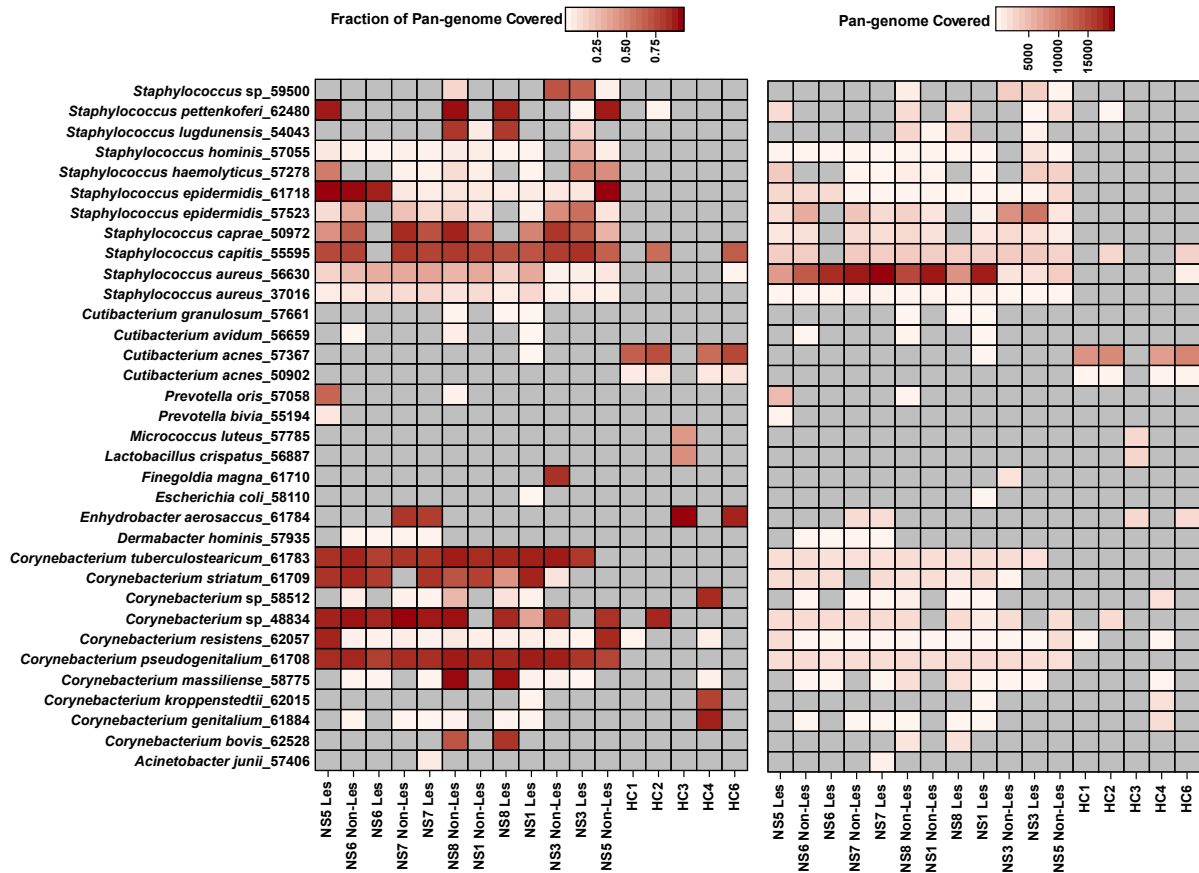

**Figure S3. (Related to Figure 1) Pan genome coverage of bacteria species on Netherton skin. Related to Figure 1.** Fraction of pan-genome covered across samples, for each prevalent species of interest.

**(A)** Fraction of pan-genome covered (proportion of non-redundant genes in the reference pan-genome with at least one mapped read).

**(B)** Number of genes from the pan-genome with at least 1 mapped read.

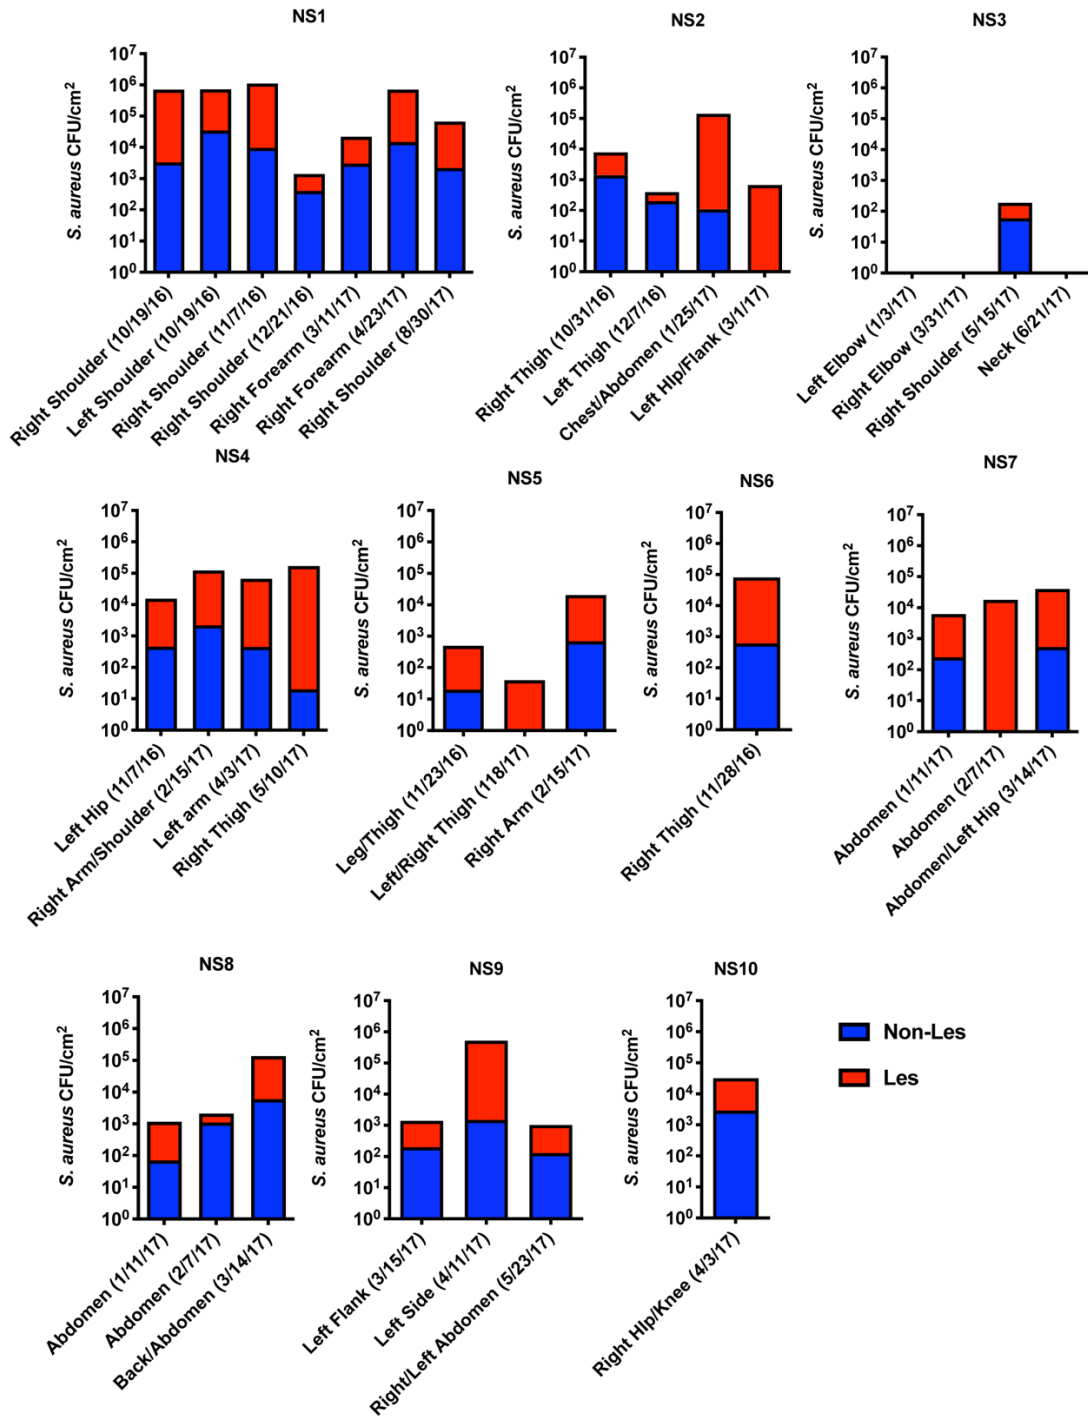

**Figure S4. (Related to Figure 2) Live *S. aureus* CFU by individual subject swab site.** Comparison of absolute abundance of *S. aureus* per cm<sup>2</sup> of skin swabbed across all Netherton syndrome (NS1-10) subjects with both body site where swabbed and date collected. Both non-lesional (blue bars) and lesional (red bars) were compared as well.

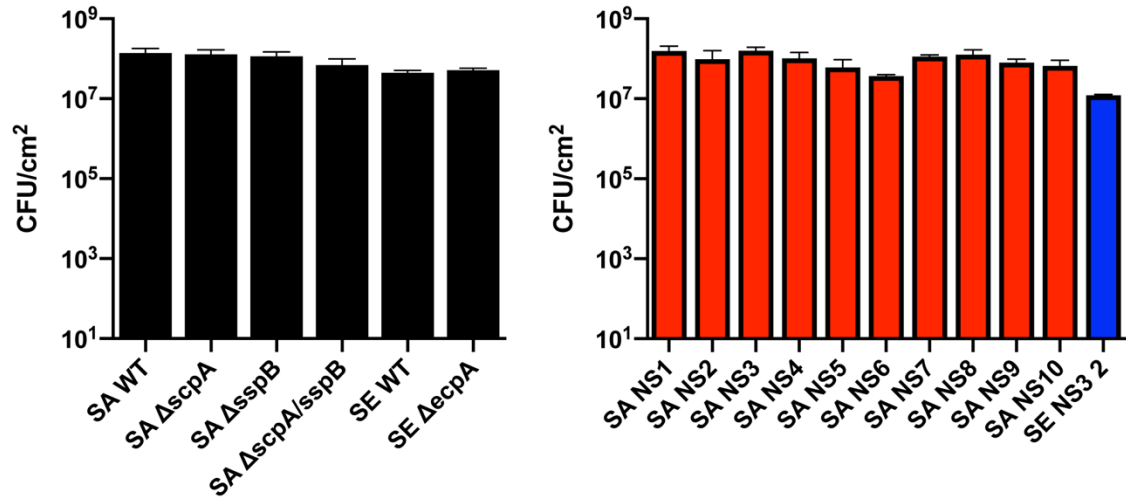

**Figure S5. (Related to Figures 3-5) Colony-forming units of bacteria from epicutaneous murine models.** Quantity of colony-forming units (CFU) of bacteria per cm<sup>2</sup> of murine back skin after 48h of colonization.

**(A)** *S. aureus* and *S. epidermidis* cysteine protease knockout bacteria CFU counts.

**(B)** Clinical staphylococci isolate CFU counts.

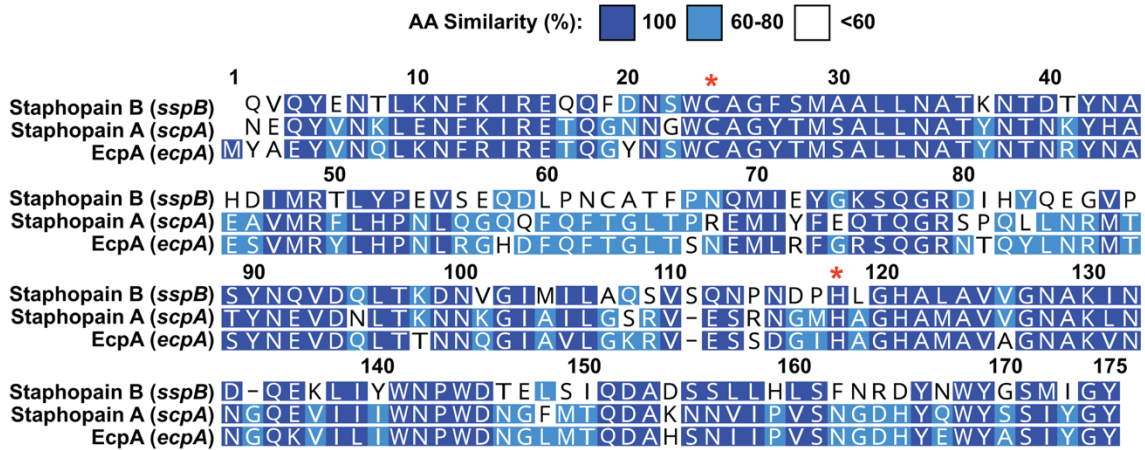

**Figure S6. (Related to Figure 5) Comparison of active cysteine protease sequence for Staphopains A/B and EcpA.** Alignment of active amino acid sequences for *S. aureus* Staphopain A (*scpA*), Staphopain B (*sspB*), and *S. epidermidis* EcpA (*ecpA*). Asterisks represent bindings sites for cleavage of substrates.

**Table S1. (Related to STAR Methods) Netherton syndrome subjects involved in this study.**

| Subject | Sex | Age (Years) | Sampling date | Swab site                            |
|---------|-----|-------------|---------------|--------------------------------------|
| NS1     | F   | 14          | 10/19/2016    | Right and Left Shoulder <sup>M</sup> |
|         |     | 14          | 11/7/2016     | Right Shoulder                       |
|         |     | 15          | 12/21/2016    | Right Shoulder                       |
|         |     | 15          | 3/11/2017     | Right Shoulder                       |
|         |     | 15          | 4/23/2017     | Right Arm and Right Forearm          |
|         |     | 15          | 6/12/2017     | Left Leg                             |
|         |     | 15          | 8/30/2017     | Right Shoulder                       |
| NS2     | M   | 12          | 10/31/2016    | Right Thigh                          |
|         |     | 12          | 12/7/2016     | Left Thigh                           |
|         |     | 12          | 1/25/2017     | Chest (NL) Abdomen (L)               |
|         |     | 12          | 3/1/2017      | Flank R&L (NL) Hip R&L (L)           |
| NS3     | M   | 16          | 3/1/2017      | Right and Left Elbow <sup>M</sup>    |
|         |     | 16          | 3/31/2017     | Right Elbow                          |
|         |     | 16          | 5/15/2017     | Right Shoulder                       |
|         |     | 17          | 6/21/2017     | Neck                                 |
| NS4     | F   | 27          | 11/7/2016     | Left Hip                             |
|         |     | 28          | 2/15/2017     | Right Arm (NL) Right Shoulder (L)    |
|         |     | 28          | 4/3/2017      | Left Arm                             |
|         |     | 28          | 5/10/2017     | Right and Left Thigh                 |
| NS5     | F   | 35          | 11/23/2016    | Leg and Thigh <sup>M</sup>           |
|         |     | 35          | 1/18/2017     | Left Thigh (NL) Right Thigh (L)      |
|         |     | 35          | 2/15/2017     | Left and Right Arm                   |
| NS6     | M   | 42          | 11/28/2016    | Right Thigh <sup>M</sup>             |
| NS7     | F   | 45          | 1/11/2017     | Abdomen <sup>M</sup>                 |
|         |     | 45          | 2/7/2017      | Abdomen                              |
|         |     | 45          | 3/14/2017     | Abdomen (NL) Left Hip (L)            |
| NS8     | F   | 47          | 1/11/2017     | Abdomen <sup>M</sup>                 |
|         |     | 47          | 2/7/2017      | Abdomen                              |
|         |     | 47          | 3/14/2017     | Back (NL) Abdomen (L)                |
| NS9     | F   | 18          | 3/15/2017     | Left Flank                           |
|         |     | 18          | 4/11/2017     | Left Flank                           |
|         |     | 18          | 5/22/2017     | Right Abdomen                        |
| NS10    | M   | 28          | 4/3/2017      | Right Hip Right Knee Right Thigh     |

\*NS=Netherton syndrome; NL=Non-lesional; L=Lesional

\*M=Samples used from metagenomic analysis



**Table S2. (Related to STAR Methods) Healthy controls involved in this study.**

| Subject | Sex | Age (Years) | Sampling date | Swab Site            |
|---------|-----|-------------|---------------|----------------------|
| HC1     | F   | 28          | 1/2/2018      | Arm <sup>M</sup>     |
|         |     |             | 1/2/2018      | Abdomen              |
|         |     |             | 1/2/2018      | Leg                  |
| HC2     | F   | 38          | 2/1/2018      | Arm <sup>M</sup>     |
|         |     |             | 2/1/2018      | Abdomen              |
|         |     |             | 2/1/2018      | Leg                  |
| HC3     | F   | 27          | 2/1/2018      | Arm                  |
|         |     |             | 2/1/2018      | Abdomen              |
|         |     |             | 2/1/2018      | Leg <sup>M</sup>     |
| HC4     | F   | 27          | 2/1/2018      | Arm                  |
|         |     |             | 2/1/2018      | Abdomen              |
|         |     |             | 2/1/2018      | Leg <sup>M</sup>     |
| HC5     | M   | 30          | 2/1/2018      | Arm                  |
|         |     |             | 2/1/2018      | Abdomen              |
|         |     |             | 2/1/2018      | Leg                  |
| HC6     | M   | 33          | 2/1/2018      | Arm                  |
|         |     |             | 2/1/2018      | Abdomen <sup>M</sup> |
|         |     |             | 2/1/2018      | Leg                  |
| HC7     | F   | 52          | 2/1/2018      | Arm                  |
|         |     |             | 2/1/2018      | Abdomen              |
|         |     |             | 2/1/2018      | Leg                  |
| HC8     | F   | 38          | 2/1/2018      | Arm                  |
|         |     |             | 2/1/2018      | Abdomen              |
|         |     |             | 2/1/2018      | Leg                  |

\*HC=Healthy control subject

\*M=Samples used from metagenomic analysis

**Table S3. (Related to STAR Methods) Metagenomic library prep and sequencer read count data.**

| Samples          | Sequencing Code Names | I7 INDEX ID (SWIFT A+B) | INDEX        | I5 INDEX ID | INDEX 2      | Peak Size (Average) | Total Reads | Trimmed Reads (% of Total Reads) | Human Reads | Non-Human Reads (%) |
|------------------|-----------------------|-------------------------|--------------|-------------|--------------|---------------------|-------------|----------------------------------|-------------|---------------------|
| HC1              | HC1                   | A002                    | CGAT<br>GTAT | Univ        | TCTTT<br>CCC | 475                 | 1.49E+06    | 8.22E+05<br>(55.19)              | 4.44E+05    | 3.78E+05<br>(45.96) |
| HC2              | HC2                   | A004                    | TGAC<br>CAAT | Univ        | TCTTT<br>CCC | 489                 | 2.63E+06    | 1.16E+06<br>(44.22)              | 2.68E+05    | 8.96E+05<br>(76.99) |
| HC3              | HC3                   | A013                    | AGTC<br>AACA | Univ        | TCTTT<br>CCC | 454                 | 3.57E+06    | 1.74E+06<br>(48.83)              | 5.99E+05    | 1.14E+06<br>(65.59) |
| HC4              | HC4                   | A014                    | AGTTC<br>CGT | Univ        | TCTTT<br>CCC | 471                 | 2.58E+06    | 1437158<br>(55.68)               | 6.07E+05    | 8.30E+05<br>(57.77) |
| HC6              | HC6                   | A015                    | ATGTC<br>AGA | Univ        | TCTTT<br>CCC | 446                 | 1.82E+06    | 9.67E+05<br>(53.24)              | 1.94E+05    | 7.72E+05<br>(79.89) |
| NS1 Non-Lesional | 1M                    | A016                    | CCGTC<br>CCG | Univ        | TCTTT<br>CCC | 461                 | 3.38E+07    | 1.80E+07<br>(53.36)              | 1.53E+07    | 2.68E+07<br>(14.89) |
| NS1 Lesional     | 2M                    | A018                    | GTCC<br>GCAC | Univ        | TCTTT<br>CCC | 469                 | 2.35E+07    | 1.24E+07<br>(52.81)              | 9.28E+06    | 3.14E+06<br>(25.30) |
| NS5 Non-Lesional | 9M                    | A019                    | GTGA<br>AACG | Univ        | TCTTT<br>CCC | 457                 | 2.31E+06    | 1.26E+06<br>(54.47)              | 1.52E+05    | 1.10E+06<br>(87.88) |
| NS5 Lesional     | 10M                   | A001                    | ATCA<br>CGAT | Univ        | TCTTT<br>CCC | 474                 | 5.51E+06    | 3.20E+06<br>(58.14)              | 1.79E+06    | 1.41E+06<br>(44.06) |
| NS6 Non-Lesional | 11M                   | A003                    | TTAG<br>GCAT | Univ        | TCTTT<br>CCC | 480                 | 1.39E+07    | 5.95E+06<br>(42.67)              | 5.04E+06    | 8.90E+05<br>(15.00) |
| NS6 Lesional     | 12M                   | A008                    | ACTTG<br>AAT | Univ        | TCTTT<br>CCC | 469                 | 3.27E+07    | 1.66E+07<br>(50.81)              | 1.50E+07    | 1.63E+06<br>(9.81)  |

| <b>Samples</b>   | <b>Sequencing Code Names</b> | <b>I7 INDEX ID (SWIFT A+B)</b> | <b>INDEX</b> | <b>I5 INDEX ID</b> | <b>INDEX 2</b> | <b>Peak Size (Average)</b> | <b>Total Reads</b> | <b>Trimmed Reads (% of Total Reads)</b> | <b>Human Reads</b> | <b>Non-Human Reads (%)</b> |
|------------------|------------------------------|--------------------------------|--------------|--------------------|----------------|----------------------------|--------------------|-----------------------------------------|--------------------|----------------------------|
| NS7 Non-Lesional | 17M                          | A009                           | GATC AGAT    | Univ               | TCTTT CCC      | 460                        | 1.83E+07           | 1.03E+07 (56.55)                        | 8.05E+06           | 2.27E+06 (21.97)           |
| NS7 Lesional     | 18M                          | A020                           | GTGG CCTT    | Univ               | TCTTT CCC      | 427                        | 1.13E+07           | 5.94E+06 (52.34)                        | 3.90E+06           | 2.04E+06 (34.33)           |
| NS8 Non-Lesional | 19M                          | A021                           | GTTTC GGA    | Univ               | TCTTT CCC      | 424                        | 5.17E+07           | 2.85E+07 (55.11)                        | 2.32E+07           | 5.42E+06 (18.66)           |
| NS8 Lesional     | 20M                          | A022                           | CGTA CGTA    | Univ               | TCTTT CCC      | 423                        | 4.32E+07           | 2.33E+07 (53.84)                        | 2.08E+07           | 2.46E+06 (10.59)           |
| NS3 Non-Lesional | 35M                          | A023                           | GAGT GGAT    | Univ               | TCTTT CCC      | 424                        | 3.37E+06           | 1.56E+06 (46.14)                        | 7.28E+05           | 8.29E+05 (53.25)           |
| NS3 Lesional     | 36M                          | A025                           | ACTG ATAT    | Univ               | TCTTT CCC      | 413                        | 4.02E+06           | 2.13E+06 (52.90)                        | 1.40E+05           | 1.99E+06 (93.41)           |
